# Supplementary material for: Probing the binding mode and interactions of proteinase K and glutathione: molecular simulation and experiments
Source: Royal Society of Chemistry journal article supplement (doi:10.1039/d4sm01039f), 2024-01-01
Supplement: d4sm01039f1.pdf [file d4sm01039f1.pdf]

## Supporting Information

### **Probing the Binding Mode and Interactions of Proteinase K and Glutathione: Molecular Simulation and Experiments**

Yuan Yang,<sup>a</sup> Bianxiang Zhang,<sup>\*a</sup> Jian Zhang<sup>\*a</sup>

Y Yang, Prof. B. Zhang, Prof. J. Zhang

<sup>a</sup> School of Chemistry and Chemical Engineering, Shanxi University, 030006, Taiyuan  
(China)

\*Corresponding Authors: Bianxiang Zhang, Jian Zhang

E-mail: zbxthh@sxu.edu.cn; zhangjian@sxu.edu.cn

## **Content**

|                             |   |
|-----------------------------|---|
| Supplementary figures ..... | 3 |
| Supplementary tables .....  | 7 |

## Supplementary figures

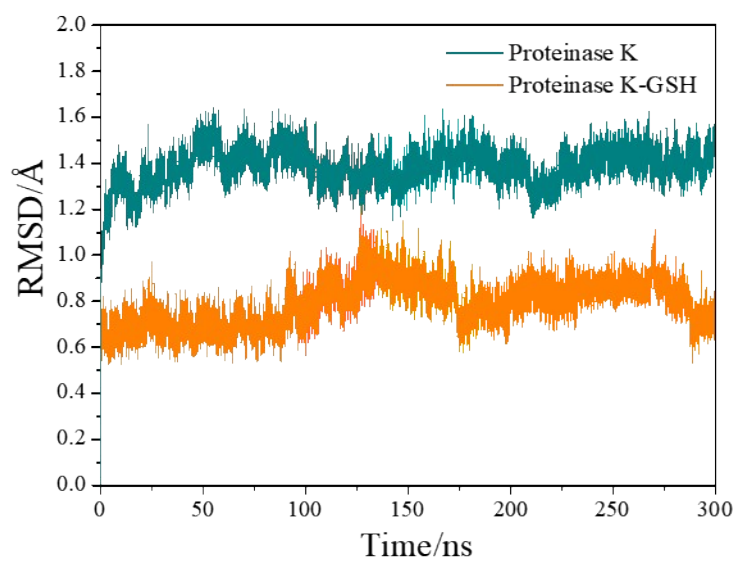

Fig. S1 RMSD fluctuations of proteinase K before and after binding to GSH.

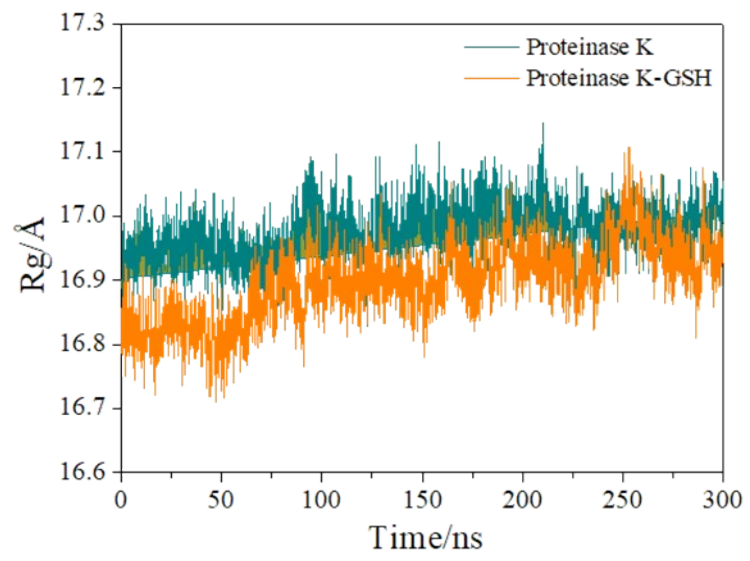

Fig. S2 Rg of proteinase K before and after binding to GSH.

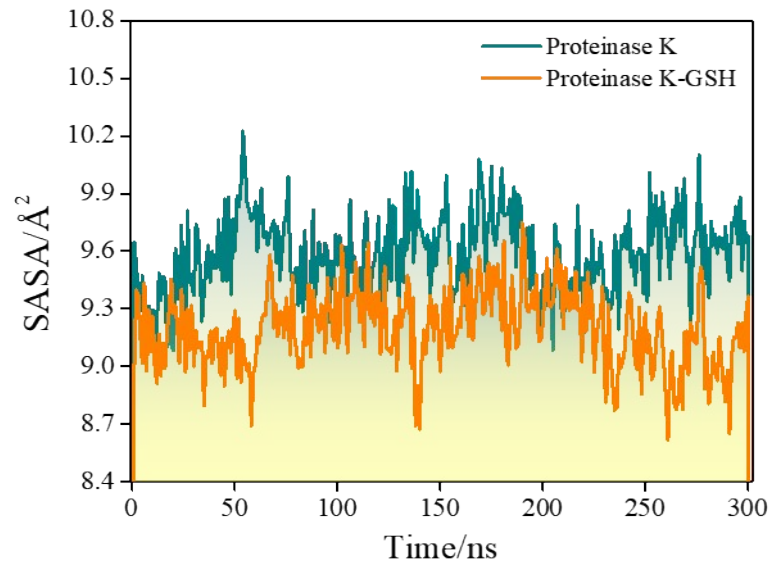

Fig. S3 SASA of proteinase K before and after binding to GSH.

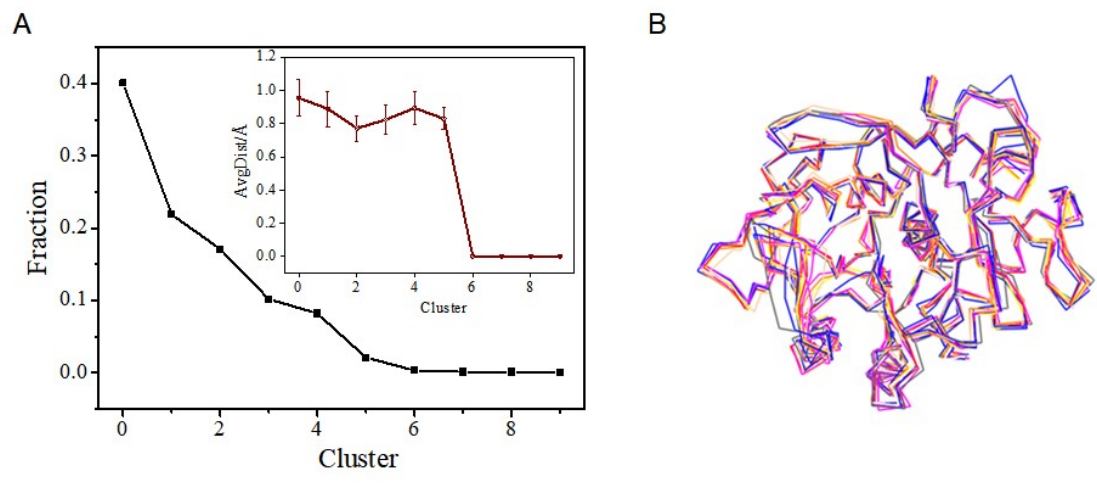

Fig. S4 (A) The clusters of proteinase K-GSH complex. (B) The spatial conformation of clusters.

## Supplementary tables

**Table S1** Energetic contributions of significant residues of proteinase K bindings with GSH

| Residue | $B_{vdw}^{a)}$ | $S_{vdw}^{a)}$ | $B_{ele}^{a)}$ | $S_{ele}^{a)}$ | Polar solv. $^{a)}$ | Total $^{a)}$ |
|---------|----------------|----------------|----------------|----------------|---------------------|---------------|
| Asp39   | -0.122         | 1.142          | -0.024         | -24.455        | 16.349              | -7.154        |
| His69   | -0.178         | -0.528         | 0.421          | -0.746         | 0.797               | -0.362        |
| Leu96   | -0.039         | -0.961         | -0.047         | 0.282          | -0.056              | -1.049        |
| Leu133  | -0.596         | -1.569         | -1.373         | 0.240          | 0.961               | -2.476        |
| Glu135  | -0.575         | -0.322         | -1.419         | 0.239          | 1.176               | -1.044        |
| Asn161  | -0.180         | -0.405         | -0.265         | -0.277         | 0.975               | -0.244        |
| Asn162  | -0.067         | -0.191         | -0.054         | -1.971         | 1.721               | -0.713        |
| Ser224  | -0.076         | -0.328         | -0.462         | 0.229          | 0.324               | -0.351        |

<sup>a)</sup> All energy units are  $\text{kJ mol}^{-1}$ .  $B_{vdw}$  represents the van der Waals forces of the backbone of amino acid residues;  $S_{vdw}$  represents the van der Waals forces of the side chain of amino acid residues;  $B_{ele}$  represents the electrostatic interactions of the backbone of amino acid residues;  $S_{ele}$  represents the electrostatic interactions of the side chain of amino acid residues; Polar solv. represents the free energy of polar solvation.

**Table S2** Hydrogen bonding interactions of GSH with proteinase K

| Acceptor  | DonorH      | Donor      | Frac/% | AvgDist/Å | AvgAng/deg |
|-----------|-------------|------------|--------|-----------|------------|
| Asp39@OD1 | GSH@HO4     | GSH@O4     | 29.47  | 2.6572    | 162.2084   |
| Asp39@OD2 | GSH@HO4     | GSH@O4     | 22.22  | 2.6493    | 161.5201   |
| Gly100@O  | GSH@HO4     | GSH@O4     | 8.99   | 2.7413    | 156.8901   |
| Ser132@O  | GSH@H7      | GSH@N1     | 7.61   | 2.8690    | 153.0704   |
| GSH@O1    | Ser224@H    | Ser224@N   | 23.23  | 2.8852    | 164.3316   |
| GSH@O6    | Asn161@HD21 | Asn161@ND2 | 21.85  | 2.8355    | 151.5626   |
| GSH@O6    | Asn161@H    | Asn161@N   | 15.05  | 2.8764    | 158.3816   |
| GSH@O2    | Gly134@H    | Gly134@N   | 12.34  | 2.8713    | 159.2309   |
| GSH@O6    | Asn162@HD21 | Asn162@ND2 | 9.31   | 2.8654    | 156.0028   |



**Table S3** The quenching constants of the interaction of proteinase K with GSH.

| T/K | $K_{sv}/(\text{L}\cdot\text{mol}^{-1})$ | $K_q/(\text{L}\cdot\text{mol}^{-1}\cdot\text{s}^{-1})$ | $R^2$ |
|-----|-----------------------------------------|--------------------------------------------------------|-------|
| 298 | 4821.1                                  | $4.82\times 10^{11}$                                   | 0.994 |
| 303 | 4727.6                                  | $4.73\times 10^{11}$                                   | 0.995 |
| 308 | 4305.1                                  | $4.31\times 10^{11}$                                   | 0.989 |

**Table S4** The content of secondary structures of proteinase K with GSH.

| Sample                         | Alpha helix (%) | Beta sheet (%) | Turn (%) | Unordered (%) |
|--------------------------------|-----------------|----------------|----------|---------------|
| proteinase K                   | 7.9             | 27.7           | 10.9     | 53.5          |
| proteinase K + 34 $\mu$ M GSH  | 7.9             | 29.5           | 11.4     | 51.2          |
| proteinase K + 170 $\mu$ M GSH | 7.1             | 34             | 7.5      | 51.4          |
| proteinase K + 340 $\mu$ M GSH | 6.6             | 33.9           | 6.7      | 52.8          |
| proteinase K + 680 $\mu$ M GSH | 6.8             | 34.2           | 6.9      | 52.1          |
